# Supplementary material
Source: HighWire-hosted journal article supplement (https://cmajopen.ca/highwire/filestream/80971/field_highwire_adjunct_files/3/open-2014-0079-4-at.pdf)
Supplement: open-2014-0079-4-at.pdf [file open-2014-0079-4-at.pdf]

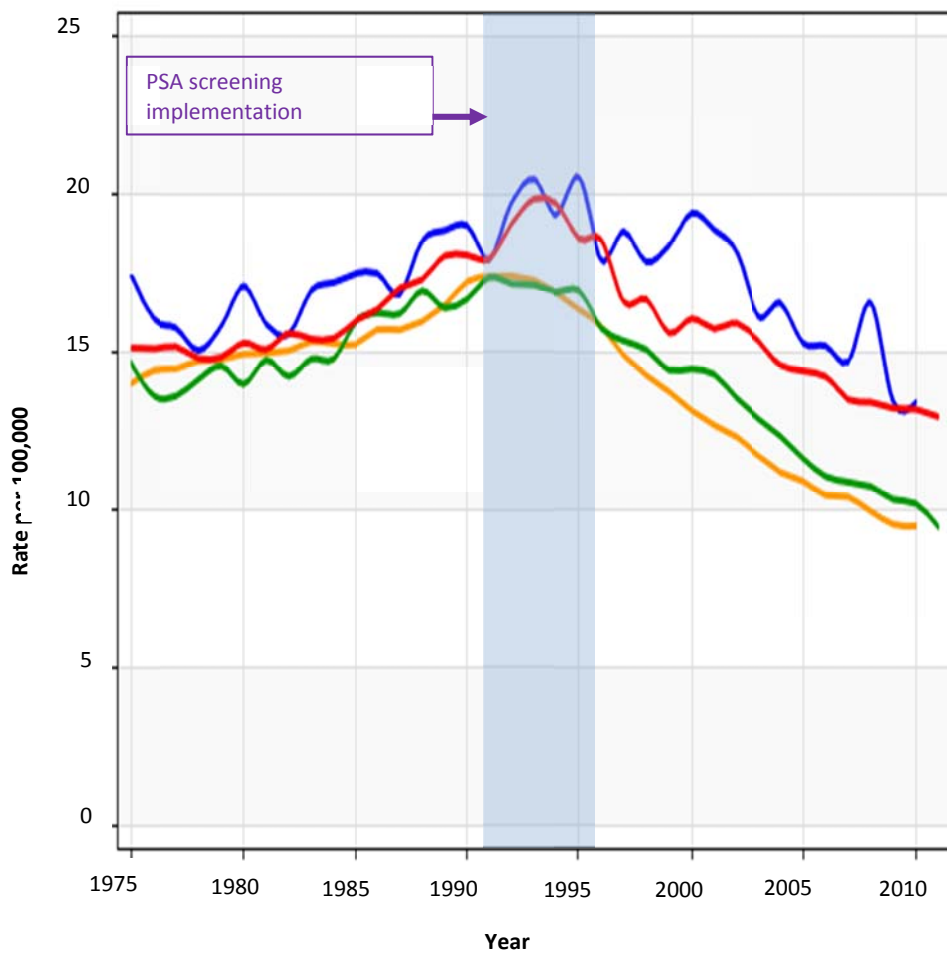

■ New Zealand  
■ Australia  
■ Canada  
■ USA

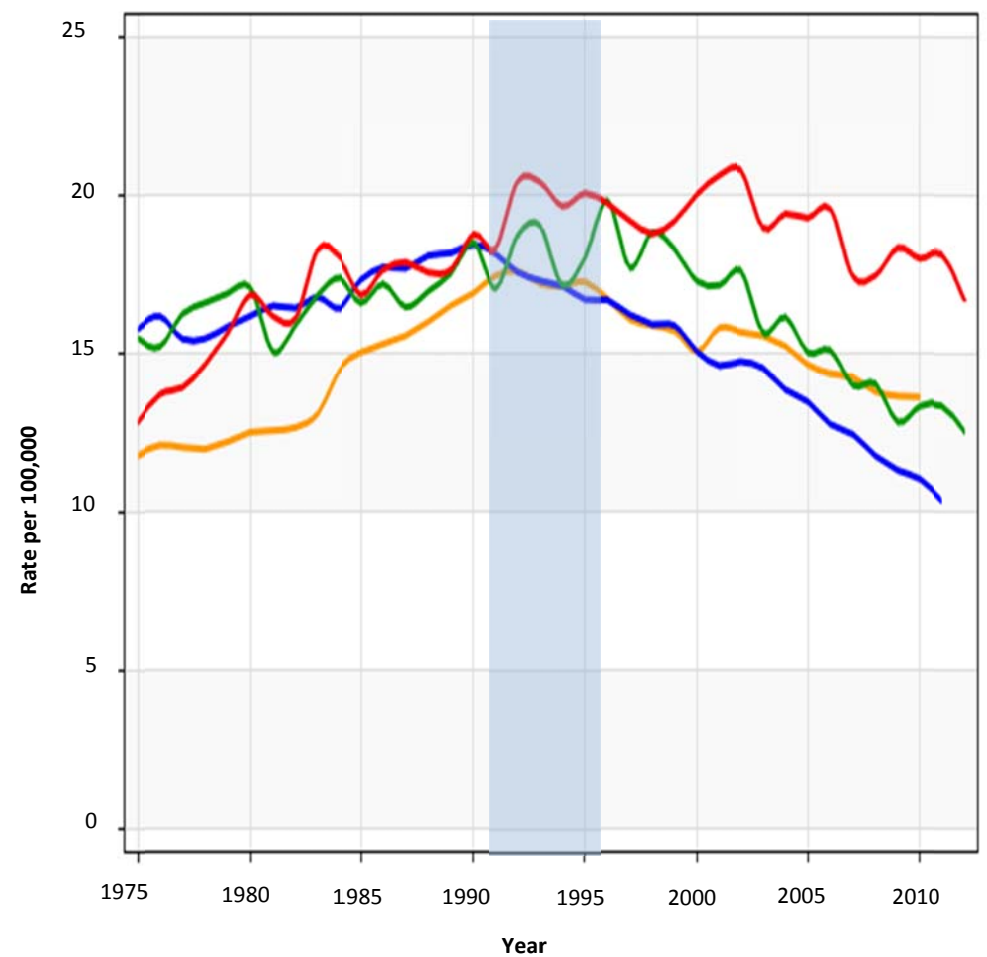

■ Denmark  
■ Finland  
■ France  
■ United Kingdom

**Appendix 4 (as supplied by the authors): Mortality of Prostate Cancer in selected countries, 1975-2012, showing changes related to PSA screening implementation (data from IARC Globocan).**

Appendix to: Dickinson J, Shane A, Tonelli M, et al. Trends in prostate cancer incidence and mortality in Canada during the era of prostate-specific antigen screening. *CMAJ Open* 2016. DOI:10.9778/cmajo.20140079.
